# Supplementary material for: Human epididymis protein 4 (HE4) is a novel biomarker for fibrosis in IgG4-related disease and can predict poor prognosis
Source: HighWire-hosted journal article supplement (doi:10.1136/rmdopen-2022-002521), 2022-09-01
Supplement: rmdopen-2022-002521supp001_data_supplement.pdf [file rmdopen-2022-002521supp001_data_supplement.pdf]

**Table S1. Detailed Clinical features of the enrolled IgG4-RD patients and the matched healthy controls.**

|                                        | <b>IgG4-RD<br/>(n=136)</b> | <b>HC<br/>(n=73)</b> |
|----------------------------------------|----------------------------|----------------------|
| <b>Demography</b>                      |                            |                      |
| Sex (male, %)                          | 77 (56.6%)                 | 38 (52.1%)           |
| Age at onset (years, mean $\pm$ SD)    | 54.30 $\pm$ 11.48          | 52.30 $\pm$ 10.67    |
| Disease duration (months, median, IQR) | 12(6-36)                   | NA                   |
| Affected organ numbers (mean $\pm$ SD) | 2.79 $\pm$ 1.56            | NA                   |
| <b>Serology (Median, IQR)</b>          |                            |                      |
| IgG (g/L)                              | 18.19 (13.94-23.42)        | NA                   |
| IgG1 (mg/L)                            | 8640.00 (7310.00-10625.00) | NA                   |
| IgG2 (mg/L)                            | 5300.00 (3915.00-6805.00)  | NA                   |
| IgG3 (mg/L)                            | 398.00 (235.50-790.75)     | NA                   |
| IgG4 (mg/L)                            | 8460.00 (3260.00-18475.00) | NA                   |
| IgA (g/L)                              | 1.79 (1.25-2.54)           | NA                   |
| IgM (g/L)                              | 0.73 (0.53-1.08)           | NA                   |
| IgE (KU/L)                             | 255.00 (90.38-672.00)      | NA                   |
| RF (IU/L)                              | 12.45 (5.50-26.90)         | NA                   |
| ESR (mm/h)                             | 17.00 (8-33)               | NA                   |
| CRP (mg/L)                             | 1.57 (0.73-5.48)           | NA                   |
| C3 (g/L)                               | 0.96 (0.74-1.17)           | NA                   |
| C4 (g/L)                               | 0.15 (0.10-0.23)           | NA                   |
| Eosinophils ( $10^9/L$ )               | 0.23 (0.12-0.42)           | NA                   |
| ALT (g/L)                              | 19.50 (13.00-31.00)        | NA                   |
| AST (g/L)                              | 21.00 (16.00-35.25)        | NA                   |
| Tbil ( $\mu$ mol/L)                    | 11.55 (8.85-19.33)         | NA                   |
| Dbil ( $\mu$ mol/L)                    | 3.33 (2.60-6.50)           | NA                   |
| ALP (U/L)                              | 87 (60-140.75)             | NA                   |
| GGT (U/L)                              | 22.9 (15.50-96.00)         | NA                   |
| BUN (mmol/L)                           | 5.38 (4.50-6.53)           | NA                   |
| Cr ( $\mu$ mol/L)                      | 67.00 (59.00-79.00)        | NA                   |
| TG (mmol/L)                            | 1.03 (0.69-1.34)           | NA                   |
| TC (mmol/L)                            | 4.66 (4.12-5.76)           | NA                   |
| LDL (mmol/L)                           | 2.84 (2.48-3.73)           | NA                   |
| HDL (mmol/L)                           | 1.34 (1.17-1.51)           | NA                   |
| UA ( $\mu$ mol/L)                      | 341.00 (275.70-435.00)     | NA                   |
| <b>Organ involvements (n%)</b>         |                            |                      |
| Lacrimal gland                         | 60 (44.12%)                | NA                   |
| Parotid gland                          | 17 (12.50%)                | NA                   |
| Submandibular gland                    | 69 (50.74%)                | NA                   |
| Pancreas                               | 44 (32.35%)                | NA                   |
| Bile duct                              | 18 (13.24%)                | NA                   |

|                 |             |    |
|-----------------|-------------|----|
| Lung            | 32 (23.53%) | NA |
| Kidney          | 9 (6.62%)   | NA |
| Retroperitoneum | 13 (9.56%)  | NA |
| Paranasal sinus | 33 (24.26%) | NA |
| Thyroid         | 4 (2.94%)   | NA |
| Pituitary       | 3 (2.21%)   | NA |
| Lymph node      | 32 (23.53%) | NA |

---

**S.D. represented for Standard deviation, IQR represented for interquartile range.**

**IgG, IgA, IgM, IgE were immunoglobulin G, A, M and E. ESR was Erythrocyte Sedimentation Rate, CRP was C-reactive protein, RF was rheumatoid factor and C3/4 represented for complement 3/4.**

**ALT represented for alanine aminotransferase; AST represented for aspartate aminotransferase; Tbil was Total bilirubin; Dbil was direct bilirubin; ALP was Alkaline Phosphatase; GGT was gamma-glutamyl transpeptidase; BUN was blood urea nitrogen; Cr was Creatinine; TG was triglyceride; TC was total cholesterol; LDL was Low Density Lipoprotein; HDL was High Density Lipoprotein; UA was Uric Acid.**

**(\*P<0.05, \*\*P<0.01, \*\*\*P<0.001)**



**Table S2. Comparison the clinical features between HE4 positive patients and HE4 negative patients.**

|                                        | HE4 positive<br>(n=100) | HE4 negative<br>(n=36) | P-value   |
|----------------------------------------|-------------------------|------------------------|-----------|
| <b>Demography</b>                      |                         |                        |           |
| Sex (male, %)                          | 64 (64%)                | 13 (36.11%)            | **0.004   |
| Age at onset (years, mean $\pm$ SD)    | 56.64 $\pm$ 10.66       | 47.81 $\pm$ 11.33      | ***<0.001 |
| Disease duration (months, median, IQR) | 12 (6-36)               | 24 (6-48)              | 0.148     |
| Affected organ numbers (mean $\pm$ SD) | 2.78 $\pm$ 1.58         | 2.83 $\pm$ 1.50        | 0.861     |
| <b>Serology (Median, IQR)</b>          |                         |                        |           |
| IgG (g/L)                              | 18.72 (13.94-26.83)     | 17.63 (13.08-20.67)    | 0.162     |
| IgA (g/L)                              | 1.42 (1.14-2.34)        | 2.24 (1.79-2.92)       | ***<0.001 |
| IgM (g/L)                              | 0.69 (0.48-0.97)        | 0.93 (0.56-1.23)       | *0.048    |
| IgE (KU/L)                             | 345 (98.95-811.75)      | 200 (51.58-609)        | 0.102     |
| IgG4 (mg/L)                            | 9142 (3390-20675)       | 4330 (2462.5-13475)    | *0.012    |
| RF (IU/L)                              | 15.45 (7.75-31.58)      | 8.7 (5-24.8)           | 0.099     |
| ESR (mm/h)                             | 23 (11.25-48.5)         | 10 (6.5-14)            | ***<0.001 |
| CRP (mg/L)                             | 2.1 (0.77-7.28)         | 1.02 (0.54-2.77)       | *0.021    |
| C3 (g/L)                               | 0.92 (0.66-1.12)        | 1.06 (0.9-1.21)        | *0.028    |
| C4 (g/L)                               | 0.15 (0.08-0.23)        | 0.17 (0.13-0.24)       | 0.252     |
| Eosinophils (10 <sup>9</sup> /L)       | 0.24 (0.12-0.51)        | 0.15 (0.1-0.31)        | *0.036    |
| ALT (g/L)                              | 21 (13-42)              | 17 (12.5-23)           | 0.222     |
| AST (g/L)                              | 21 (16-47)              | 20 (14.5-22)           | 0.166     |
| Tbil ( $\mu$ mol/L)                    | 11.45 (8.85-24.18)      | 11.85 (8.93-15.43)     | 0.739     |
| Dbil ( $\mu$ mol/L)                    | 3.4 (2.55-9.5)          | 3.1 (2.7-4.95)         | 0.610     |
| ALP (U/L)                              | 89 (60-158)             | 79 (58-94)             | 0.349     |
| GGT (U/L)                              | 27 (15.5-118.5)         | 17 (15.25-24.5)        | 0.186     |
| Cr ( $\mu$ mol/L)                      | 72 (61.9-84)            | 58.55 (54-64)          | ***<0.001 |
| <b>Organ involvements (n%)</b>         |                         |                        |           |
| Lacrimal gland                         | 38 (38%)                | 22 (61.11%)            | *0.017    |
| Parotid gland                          | 13 (13%)                | 4 (11.11%)             | 0.796     |
| Submandibular gland                    | 46 (46%)                | 23 (63.89%)            | 0.066     |
| Pancreas                               | 37 (37%)                | 7 (19.44%)             | 0.054     |
| Bile duct                              | 16 (16%)                | 2 (5.55%)              | 0.154     |
| Lung                                   | 27 (27%)                | 5 (13.89%)             | 0.112     |
| Kidney                                 | 7 (7%)                  | 2 (5.55%)              | 0.765     |
| Retroperitoneum                        | 10 (10%)                | 3 (8.33%)              | 0.771     |
| Paranasal sinus                        | 23 (23%)                | 10 (27.78%)            | 0.566     |
| Thyroid                                | 3 (3%)                  | 1 (2.78%)              | 0.946     |
| Pituitary                              | 2 (2%)                  | 1 (2.78%)              | 0.785     |
| Lymph node                             | 23 (23%)                | 9 (25%)                | 0.808     |

S.D. represented for Standard deviation, IQR represented for interquartile range.

IgG, IgA, IgM, IgE were immunoglobulin G, A, M and E. ESR was Erythrocyte Sedimentation Rate, CRP was C-reactive protein, RF was rheumatoid factor and C3/4 represented for complement 3/4.

ALT represented for alanine aminotransferase; AST represented for aspartate aminotransferase; Tbil was Total bilirubin; Dbil was direct bilirubin; ALP was Alkaline Phosphatase; GGT was gamma-glutamyl transpeptidase; BUN was blood urea nitrogen; Cr was Creatinine; TG was triglyceride; TC was total cholesterol; LDL was Low Density Lipoprotein; HDL was High Density Lipoprotein; UA was Uric Acid. (\*P<0.05, \*\*P<0.01, \*\*\*P<0.001)



**Table S3. Comparison of the HE4 levels between patients with or without the corresponding organ involvements.**

| <b>Organ involvements (Median, IQR)</b> | <b>HE4 value of patients without organ involvements (pmol/L)</b> | <b>Number of patients without organ involvements</b> | <b>HE4 value of patients with organ involvements (pmol/L)</b> | <b>Number of patients with organ involvements</b> | <b>P-value</b> |
|-----------------------------------------|------------------------------------------------------------------|------------------------------------------------------|---------------------------------------------------------------|---------------------------------------------------|----------------|
| <b>Pancreas</b>                         | 56.1 (48.075-79.525)                                             | n=92                                                 | 68.45 (53.3-92.15)                                            | n=44                                              | *0.011         |
| <b>Bile duct</b>                        | 57.25 (49.575-79.825)                                            | n=118                                                | 72.65 (54.075-105.15)                                         | n=18                                              | *0.042         |
| <b>Submandibular gland</b>              | 68.4 (51.5-92.2)                                                 | n=67                                                 | 55 (48.15-71.9)                                               | n=69                                              | *0.016         |
| <b>Lacrimal gland</b>                   | 69.85 (52.825-92.15)                                             | n=76                                                 | 52.85 (45.475-62.325)                                         | n=60                                              | ***0.00009     |
| <b>Parotid gland</b>                    | 57.6 (50.2-80.2)                                                 | n=119                                                | 66.8 (50.6-109.5)                                             | n=17                                              | 0.407          |
| <b>Retroperitoneum</b>                  | 57.6 (50.2-76.5)                                                 | n=123                                                | 101 (50.55-204)                                               | n=13                                              | *0.019         |
| <b>Lung</b>                             | 56.95 (49.35-78.15)                                              | n=104                                                | 67.25 (51.525-96.65)                                          | n=32                                              | 0.06           |
| <b>Kidney</b>                           | 58.2 (50.2-80.2)                                                 | n=127                                                | 69.6 (51.75-701.5)                                            | n=9                                               | 0.119          |
| <b>Lymph node</b>                       | 57.9 (50.25-79.9)                                                | n=104                                                | 63 (49.925-102.5)                                             | n=32                                              | 0.425          |
| <b>Paranasal sinus</b>                  | 63.2 (50.4-92)                                                   | n=103                                                | 52.6 (47.95-59)                                               | n=33                                              | **0.005        |
| <b>Thyroid</b>                          | 58.4 (50.25-82.225)                                              | n=132                                                | 73.1 (46.9-127.875)                                           | n=4                                               | 0.589          |

IQR represented for interquartile range.

(\*P<0.05, \*\*P<0.01, \*\*\*P<0.001)

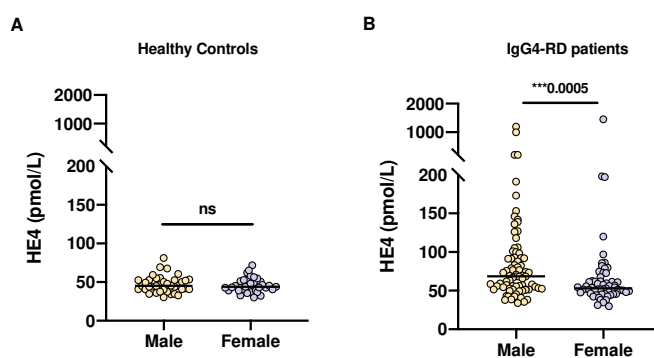

**Figure S1. Results of comparing HE4 levels between different genders in healthy controls and IgG4-RD patients (\*P-value <0.05).**

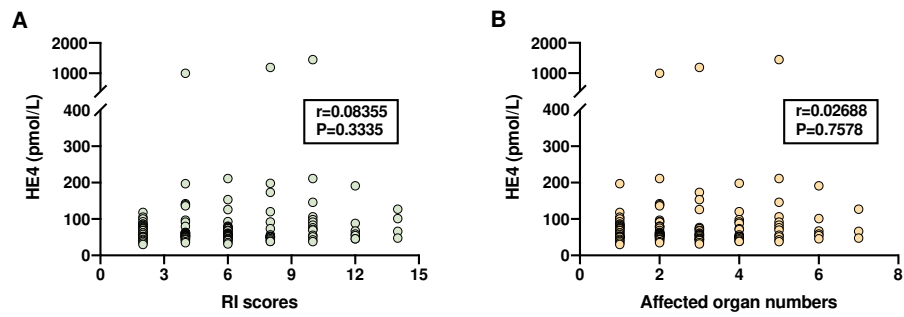

**Figure S2.** The correlations between plasma HE4 levels and (A) IgG4-RD RI scores or (B) affected organ numbers.



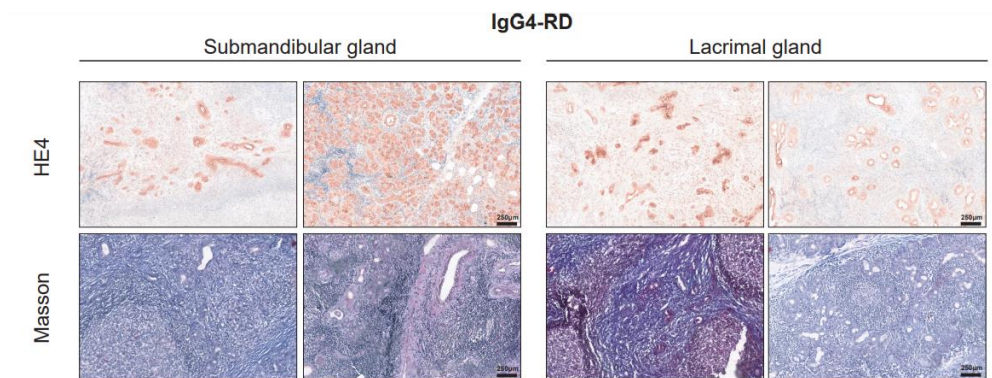

Figure S3. Immunohistochemistry and Masson trichrome stain for HE4 expression and fibrosis degree in the submandibular and lacrimal glands of IgG4-RD patients.

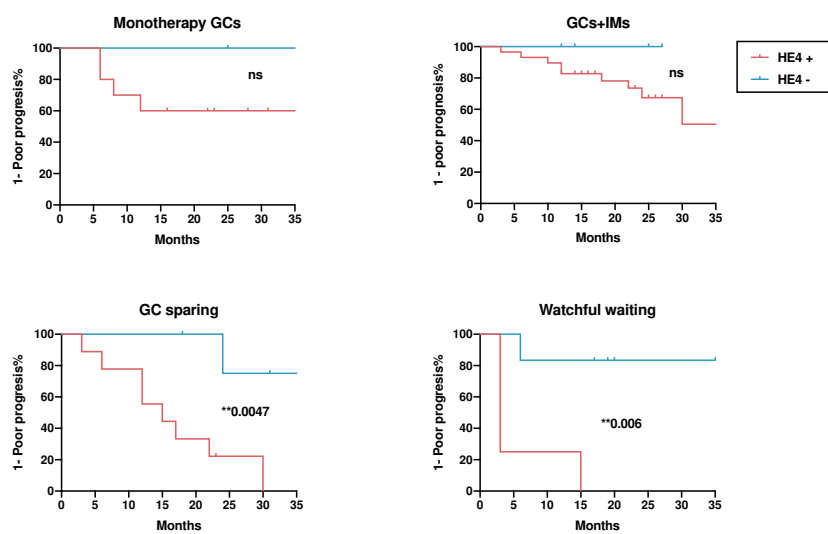

**Figure S4.** Comparison of the poor prognosis rate between HE4+ and HE4- patients under the different treatment regime: (A) GCs monotherapy; (B) GCs+IMs; (C) GC sparing; (D) Watchful waiting.
